# Supplementary material
Source: PubMed Central journal article supplement (PMC5572661)

Figure S1. Association of urine albumin to creatinine ratio with cognitive domains, highlighting only individuals with urine ACR below 300 mg/g. Models are adjusted for all model 3 variables.

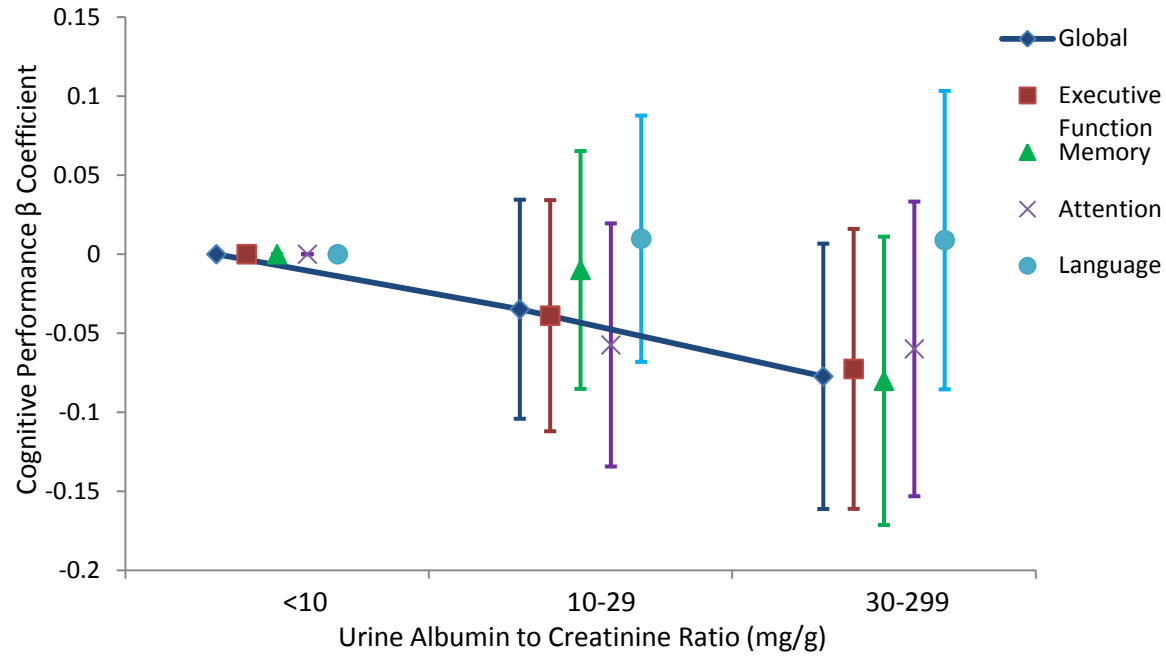

Supplement: NIHMS885979-supplement-1.pdf [file NIHMS885979-supplement-1.pdf]
