# Supplementary material
Source: PubMed Central journal article supplement (PMC5572661)
Supplement: NIHMS885979-supplement-2.pdf [file NIHMS885979-supplement-2.pdf]

**Item S1. Cognitive Function Summary Score Components by ACR and eGFR Groups**

**Table a.** Cognitive Function Summary Score Components by ACR Group

| Domain/Test                    | Maximum Score | Unadjusted Total Scores (N=2707) | Adjusted Means (SE) |               |                |              | P-value |
|--------------------------------|---------------|----------------------------------|---------------------|---------------|----------------|--------------|---------|
|                                |               |                                  | <10 (N=1386)        | 10-29 (N=776) | 30-299 (N=466) | 300+ (N=79)  |         |
| <b>Screening</b>               |               |                                  |                     |               |                |              |         |
| MoCA                           | 30            | 23.0 (0.08)                      | 20.5 (0.32)         | 20.2 (0.33)   | 20.3 (0.35)    | 19.3 (0.48)  | 0.02    |
| <b>Executive Functioning</b>   |               |                                  |                     |               |                |              |         |
| Trail Making Part B            | 300           | 119.8 (1.3)                      | 154.4 (5.97)        | 155.1 (6.05)  | 160.1 (6.46)   | 177.2 (8.88) | 0.01    |
| Category Fluency               | No limit      | 17.8 (0.10)                      | 15.5 (0.45)         | 15.5 (0.45)   | 15.5 (0.48)    | 14.5 (0.67)  | 0.4     |
| Digit Symbol Substitution      | 135           | 51.0 (0.29)                      | 43.0 (1.21)         | 42.3 (1.22)   | 41.3 (1.31)    | 39.2 (1.80)  | 0.01    |
| Digits Backward                | 16            | 7.32 (0.04)                      | 6.39 (0.20)         | 6.28 (0.21)   | 6.32 (0.22)    | 5.88 (0.30)  | 0.2     |
| <b>Memory</b>                  |               |                                  |                     |               |                |              |         |
| Logical Memory Immediate       | 28            | 19.3 (0.09)                      | 16.6 (0.41)         | 16.7 (0.42)   | 16.3 (0.45)    | 16.2 (0.61)  | 0.4     |
| Logical Memory Delayed         | 14            | 8.20 (0.06)                      | 6.83 (0.29)         | 6.78 (0.29)   | 6.92 (0.31)    | 6.61 (0.43)  | 0.8     |
| ROCF, Immediate Recall         | 24            | 14.3 (0.09)                      | 12.6 (0.41)         | 12.2 (0.42)   | 12.2 (0.44)    | 11.6 (0.62)  | 0.03    |
| HVLT-R, Trials 1-3             | 36            | 21.6 (0.10)                      | 19.1 (0.44)         | 19.1 (0.45)   | 18.5 (0.48)    | 18.4 (0.66)  | 0.08    |
| HVLT-R Delayed Recall          | 12            | 5.49 (0.07)                      | 4.07 (0.35)         | 4.20 (0.35)   | 3.89 (0.38)    | 3.63 (0.52)  | 0.4     |
| <b>Attention/Concentration</b> |               |                                  |                     |               |                |              |         |
| Trail Making Part A            | 300           | 43.5 (0.46)                      | 51.6 (2.08)         | 52.6 (2.11)   | 50.9 (2.25)    | 53.3 (3.12)  | 0.5     |
| Digits Forward                 | 16            | 9.53 (0.05)                      | 8.39 (0.23)         | 8.28 (0.23)   | 8.37 (0.24)    | 8.08 (0.34)  | 0.5     |
| MoCA Attention Subset          | 6             | 5.16 (0.02)                      | 4.58 (0.10)         | 4.52 (0.10)   | 4.50 (0.11)    | 4.32 (0.15)  | 0.1     |
| <b>Language</b>                |               |                                  |                     |               |                |              |         |
| Boston Naming                  | 15            | 11.7 (0.06)                      | 9.57 (0.25)         | 9.59 (0.26)   | 9.66 (0.27)    | 9.84 (0.38)  | 0.8     |
| MoCA Naming Subset             | 3             | 2.73 (0.01)                      | 2.65 (0.05)         | 2.65 (0.05)   | 2.66 (0.05)    | 2.58 (0.07)  | 0.6     |
| MoCA Sentence Repeat           | 2             | 1.40 (0.01)                      | 1.08 (0.06)         | 1.09 (0.07)   | 1.07 (0.07)    | 1.02 (0.10)  | 0.8     |
| <b>Ungrouped</b>               |               |                                  |                     |               |                |              |         |
| HVLT-R Discrimination Index    | 12            | 10.7 (0.03)                      | 10.3 (0.15)         | 10.3 (0.16)   | 10.3 (0.17)    | 10.3 (0.23)  | 0.9     |
| ROCF, Copying                  | 24            | 18.9 (0.07)                      | 17.9 (0.31)         | 17.7 (0.32)   | 17.5 (0.34)    | 17.8 (0.47)  | 0.2     |

Adjusted for age, network, education, race, diabetes, cardiovascular disease, use of ACE inhibitors or angiotensin receptor blockers, sex, systolic blood pressure, diastolic blood pressure, total cholesterol, HDL cholesterol, LDL cholesterol and eGFR. For all tests, higher scores represent worse performance except Trail Making Test Part A and Part B, which are timed tests and results are presented as seconds required to complete. Tests are grouped under the domain they most closely align with. P-values are for trend.

**Item S1. Cognitive Function Summary Score Components by ACR and eGFR Groups**

**Table b.** Cognitive Function Summary Score Components by eGFR Group

| Variable                       | Maximum Score | Unadjusted Total Scores (N=2707) | Adjusted Mean (SE) |               |               |               |              | P-value |
|--------------------------------|---------------|----------------------------------|--------------------|---------------|---------------|---------------|--------------|---------|
|                                |               |                                  | 90+ (N=530)        | 75-89 (N=700) | 60-74 (N=678) | 45-59 (N=493) | <45 (N=306)  |         |
| <b>Screening</b>               |               |                                  |                    |               |               |               |              |         |
| MoCA                           | 30            | 23.0 (0.08)                      | 20.4 (0.34)        | 20.2 (0.33)   | 20.5 (0.33)   | 20.2 (0.34)   | 20.1 (0.36)  | 0.2     |
| <b>Executive Functioning</b>   |               |                                  |                    |               |               |               |              |         |
| Trail Making Part B            | 300           | 119.8 (1.3)                      | 158.7 (6.38)       | 154.6 (6.17)  | 153.0 (6.16)  | 159.4 (6.29)  | 162.2 (6.71) | 0.1     |
| Category Fluency               | No limit      | 17.8 (0.10)                      | 15.6 (0.48)        | 15.4 (0.46)   | 15.7 (0.46)   | 15.1 (0.47)   | 15.3 (0.50)  | 0.3     |
| Digit Symbol Substitution      | 135           | 51.0 (0.29)                      | 41.7 (1.29)        | 43.0 (1.25)   | 43.8 (1.25)   | 41.4 (1.27)   | 40.9 (1.36)  | 0.001   |
| Digits Backward                | 16            | 7.32 (0.04)                      | 6.22 (0.22)        | 6.38 (0.21)   | 6.46 (0.21)   | 6.13 (0.21)   | 6.32 (0.23)  | 0.07    |
| <b>Memory</b>                  |               |                                  |                    |               |               |               |              |         |
| Logical Memory Immediate       | 28            | 19.3 (0.09)                      | 16.8 (0.44)        | 16.8 (0.43)   | 16.7 (0.43)   | 16.3 (0.44)   | 16.2 (0.46)  | 0.1     |
| Logical Memory Delayed         | 14            | 8.20 (0.06)                      | 7.04 (0.31)        | 6.84 (0.30)   | 6.89 (0.30)   | 6.69 (0.30)   | 6.35 (0.32)  | 0.05    |
| ROCF, Immediate Recall         | 24            | 14.3 (0.09)                      | 12.5 (0.44)        | 12.3 (0.43)   | 12.3 (0.42)   | 12.4 (0.43)   | 12.4 (0.46)  | 0.9     |
| HVLT-R, Trials 1-3             | 36            | 21.6 (0.10)                      | 19.4 (0.47)        | 19.2 (0.46)   | 19.2 (0.45)   | 18.6 (0.46)   | 18.2 (0.50)  | 0.004   |
| HVLT-R Delayed Recall          | 12            | 5.49 (0.07)                      | 4.19 (0.37)        | 3.98 (0.36)   | 4.19 (0.36)   | 3.95 (0.37)   | 3.98 (0.39)  | 0.7     |
| <b>Attention/Concentration</b> |               |                                  |                    |               |               |               |              |         |
| Trail Making Part A            | 300           | 43.5 (0.46)                      | 52.0 (2.22)        | 50.8 (2.15)   | 52.1 (2.15)   | 52.5 (2.20)   | 53.2 (2.34)  | 0.6     |
| Digits Forward                 | 16            | 9.53 (0.05)                      | 8.25 (0.24)        | 8.39 (0.23)   | 8.35 (0.23)   | 8.28 (0.24)   | 8.36 (0.25)  | 0.9     |
| MoCA Attention Subset          | 6             | 5.16 (0.02)                      | 4.52 (0.11)        | 4.57 (0.10)   | 4.54 (0.10)   | 4.54 (0.11)   | 4.46 (0.11)  | 0.7     |
| <b>Memory</b>                  |               |                                  |                    |               |               |               |              |         |
| Boston Naming                  | 15            | 11.7 (0.06)                      | 9.58 (0.27)        | 9.70 (0.26)   | 9.71 (0.26)   | 9.57 (0.27)   | 9.32 (0.28)  | 0.3     |
| MoCA Naming Subset             | 3             | 2.73 (0.01)                      | 2.64 (0.05)        | 2.63 (0.05)   | 2.67 (0.05)   | 2.64 (0.05)   | 2.62 (0.05)  | 0.6     |
| MoCA Sentence Repeat           | 2             | 1.40 (0.01)                      | 1.08 (0.07)        | 1.04 (0.07)   | 1.07 (0.07)   | 1.13 (0.07)   | 1.12 (0.07)  | 0.2     |
| <b>Ungrouped</b>               |               |                                  |                    |               |               |               |              |         |
| HVLT-R Discrimination Index    | 12            | 10.7 (0.03)                      | 10.5 (0.16)        | 10.3 (0.16)   | 10.3 (0.16)   | 10.2 (0.16)   | 10.2 (0.17)  | 0.1     |
| ROCF, Copying                  | 24            | 18.9 (0.07)                      | 17.8 (0.33)        | 17.7 (0.32)   | 17.8 (0.32)   | 17.8 (0.33)   | 17.6 (0.35)  | 0.9     |

Adjusted for age, network, education, race, diabetes history, cardiovascular disease, use of ACE inhibitors or angiotensin receptor blockers, sex, systolic blood pressure, diastolic blood pressure, total cholesterol, HDL cholesterol, LDL cholesterol and log transformed urine ACR. For all tests, higher scores represent worse performance except Trail Making Test Part A and Part B, which are timed tests and scored in seconds to complete. Tests are grouped under the domain they most closely align with. P-values are for trend.
