# Supplementary material
Source: PubMed Central journal article supplement (PMC5572661)
Supplement: NIHMS885979-supplement-3.pdf [file NIHMS885979-supplement-3.pdf]

Table S1. Tasks included in the SPRINT-MIND cognitive battery

| Summary Domain            | Tests                                        | Description                                                                                                                                                                                                                               |
|---------------------------|----------------------------------------------|-------------------------------------------------------------------------------------------------------------------------------------------------------------------------------------------------------------------------------------------|
| Global Cognitive Function | All tests described below except MoCA        | ---                                                                                                                                                                                                                                       |
| Executive Function        | Trail Making Test Part B                     | Timed connect-the-dots task , alternating numbers and letters                                                                                                                                                                             |
|                           | Category Fluency Test, Animals               | Naming as many animals as possible in 60 seconds                                                                                                                                                                                          |
|                           | Digit Symbol Substitution                    | Under the numbers 1 through 9, there is a corresponding geometric symbol. This key is used to decode a as many numbered boxes as possible within 120 seconds.                                                                             |
|                           | Digit Span, backwards                        | Repeat a list of up to 8 numbers in the opposite order stated                                                                                                                                                                             |
| Memory                    | Logical Memory, immediate and delayed recall | After presentation of a short story (Story A), the examinee is asked to recall key elements first immediately and then approximately 15-30 minutes later.                                                                                 |
|                           | ROCF, immediate recall                       | Participant copies a complex geometric figure, and then attempt to reproduce the figure from memory                                                                                                                                       |
|                           | HVLT-R, sum of Trials 1, 2, and 3            | A 12 word list is read to the participant. The participant needs to recite back as many words as possible after the list is completed. The list is read two more times and the participant recites each time.                             |
|                           | HVLT-R, delayed recall                       | After approximately 20 minutes, the examinee is asked to recite as many words as they can from the initial list. The examiner then reads from a longer list, and the examinee needs to identify which of these are from the initial list. |
| Attention/Concentration   | Trail Making Test Part A                     | Timed connect-the-dots task , including only numbers                                                                                                                                                                                      |
|                           | Digit Span, forwards                         | Repeat a list of up to 8 numbers in the same order stated                                                                                                                                                                                 |
|                           | MoCA, sum of attention subset                | Fours tasks, including repeating a 5 digit series forwards, a 3 digit series backwards, finger tapping whenever a letter is read among a list of letters, a serial 7's five times                                                         |
| Language                  | Boston Naming                                | Naming 15 pictured items                                                                                                                                                                                                                  |
|                           | MoCA, naming subset                          | Naming 3 pictured items                                                                                                                                                                                                                   |
|                           | MoCA, language sentence repeat task          | Examinee is asked to repeat two sentences verbatim                                                                                                                                                                                        |

Logical memory is a subtest in the Weschler Memory Scale-Fourth Edition (WMS-IV). MoCA, Montreal Cognitive Assessment; ROCF, *Rey-Osterrieth Complex Figure*; HVLT-R, Hopkins Verbal Learning Test-Revised. ROCF copying task and HVLT discrimination index were not a priori included in a specific domain.
