# Supplementary material
Source: PubMed Central journal article supplement (PMC5572661)
Supplement: NIHMS885979-supplement-4.pdf [file NIHMS885979-supplement-4.pdf]

Table S2. Association between eGFR subdivided into clinically relevant categories and cognitive function.

| Domain Summary Score      | eGFR  | Model 1          |         | Model 2          |         | Model 3          |         |
|---------------------------|-------|------------------|---------|------------------|---------|------------------|---------|
|                           |       | Estimate (SE)    | P-value | Estimate (SE)    | P-value | Estimate (SE)    | P-value |
| Global Cognitive Function | 90+   | -0.0340 (0.0571) | <0.0001 | -0.0114 (0.0453) | 0.0004  | -0.0163 (0.045)  | 0.02    |
|                           | 75-90 | Reference        |         | Reference        |         | Reference        |         |
|                           | 60-74 | -0.0272 (0.0534) |         | 0.0269 (0.0416)  |         | 0.0299 (0.0417)  |         |
|                           | 45-59 | -0.2637 (0.0583) |         | -0.1204 (0.0460) |         | -0.0982 (0.0465) |         |
|                           | <45   | -0.3843 (0.0679) |         | -0.1728 (0.0538) |         | -0.1098 (0.0559) |         |
| Executive Function        | 90+   | -0.0580 (0.0570) | <0.0001 | -0.0449 (0.0477) | <0.0001 | -0.0537 (0.0479) | 0.001   |
|                           | 75-90 | Reference        |         | Reference        |         | Reference        |         |
|                           | 60-74 | 0.0032 (0.0534)  |         | 0.0589 (0.0438)  |         | 0.0682 (0.0440)  |         |
|                           | 45-59 | -0.2963 (0.0582) |         | -0.1510 (0.0484) |         | -0.1202 (0.0490) |         |
|                           | <45   | -0.3712 (0.0679) |         | -0.1643 (0.0566) |         | -0.0909 (0.0590) |         |
| Memory                    | 90+   | 0.0380 (0.0572)  | <0.0001 | 0.0521 (0.0498)  | 0.008   | 0.0515 (0.0494)  | 0.08    |
|                           | 75-90 | Reference        |         | Reference        |         | Reference        |         |
|                           | 60-74 | -0.0395 (0.0535) |         | 0.0167 (0.0457)  |         | 0.0129 (0.0454)  |         |
|                           | 45-59 | -0.2098 (0.0584) |         | -0.0813 (0.0505) |         | -0.0732 (0.0505) |         |
|                           | <45   | -0.3366 (0.0681) |         | -0.1526 (0.0590) |         | -0.1048 (0.0608) |         |
| Attention/Concentration   | 90+   | -0.1217 (0.0574) | <0.0001 | -0.0823 (0.0503) | 0.04    | -0.0749 (0.0505) | 0.3     |
|                           | 75-90 | Reference        |         | Reference        |         | Reference        |         |
|                           | 60-74 | -0.0590 (0.0537) |         | -0.0365 (0.0461) |         | -0.0258 (0.0464) |         |
|                           | 45-59 | -0.1866 (0.0586) |         | -0.1126 (0.0510) |         | -0.0837 (0.0517) |         |
|                           | <45   | -0.2893 (0.0683) |         | -0.1587 (0.0596) |         | -0.0903 (0.0622) |         |
| Language                  | 90+   | -0.0488 (0.0575) | 0.12    | 0.0188 (0.0508)  | 0.58    | 0.0141 (0.0512)  | 0.3     |
|                           | 75-90 | Reference        |         | Reference        |         | Reference        |         |
|                           | 60-74 | 0.0350 (0.0539)  |         | 0.0552 (0.0466)  |         | 0.0461 (0.0470)  |         |
|                           | 45-59 | -0.0210 (0.0588) |         | 0.0490 (0.0515)  |         | 0.0430 (0.0524)  |         |
|                           | <45   | -0.1428 (0.0685) |         | -0.0254 (0.0602) |         | -0.0114 (0.0630) |         |

Model 1: Univariate. Model 2: Model 1 plus age, race, education and study network. Model 3: Model 2 plus sex; diabetes history; BMI; CVD; use of ACE inhibitors or angiotensin receptor blockers; systolic blood pressure; diastolic blood pressure; total, HDL and LDL cholesterol; and log-transformed ACR. SE, standard error. P-values are for trend.
