# Supplementary material
Source: PubMed Central journal article supplement (PMC5572661)
Supplement: NIHMS885979-supplement-5.pdf [file NIHMS885979-supplement-5.pdf]

Table S3. Baseline characteristics of the SPRINT-MIND MRI subcohort.

| Variable                           | Total<br>(N=2707) | No MRI<br>(N=2073) | MRI<br>(N=637)  | P-value |
|------------------------------------|-------------------|--------------------|-----------------|---------|
| <b>Demographic Characteristics</b> |                   |                    |                 |         |
| Age (years)                        | 68.4 (8.6)        | 68.7 (8.7)         | 67.4 (8.2)      | <0.001  |
| Female (%)                         | 994 (36.7%)       | 744 (35.89%)       | 250 (39.4%)     | 0.1     |
| Race/Ethnicity (%)                 |                   |                    |                 | 0.01    |
| White                              | 1600 (59.1%)      | 1215 (58.6%)       | 385 (60.7%)     |         |
| Black                              | 824 (30.4%)       | 614 (29.6%)        | 210 (33.1%)     |         |
| Hispanic                           | 225 (8.3%)        | 195 (9.4%)         | 30 (4.7%)       |         |
| Other                              | 58 (2.1%)         | 49 (2.4%)          | 9 (1.4%)        |         |
| Education (%)                      |                   |                    |                 | 0.08    |
| Below HS Graduate                  | 227 (8.4%)        | 182 (8.8%)         | 45 (7.1%)       |         |
| HS Graduate                        | 456 (16.9%)       | 357 (17.2%)        | 99 (15.6%)      |         |
| Beyond HS                          | 2024 (74.8%)      | 1534 (74.0%)       | 490 (77.3%)     |         |
| <b>Medical History</b>             |                   |                    |                 |         |
| Cardiovascular Disease             | 543 (20.1%)       | 455 (22.0%)        | 88 (13.9%)      | <0.001  |
| Diabetes                           | 38 (1.4%)         | 27 (1.3%)          | 11 (1.7%)       | 0.4     |
| Hypertension                       | 2538 (93.8%)      | 1947 (93.9%)       | 591 (93.2%)     | 0.5     |
| Smoking                            |                   |                    |                 | 0.6     |
| Never                              | 1181 (43.7%)      | 891 (43.0%)        | 290 (45.7%)     |         |
| Former                             | 1184 (43.8%)      | 924 (44.6%)        | 260 (41.0%)     |         |
| Current                            | 339 (12.5%)       | 255 (12.3%)        | 84 (13.3%)      |         |
| <b>Hypertension Medications</b>    |                   |                    |                 |         |
| ACE Inhibitor                      | 1004 (37.1%)      | 769 (37.1%)        | 235 (37.1%)     | 0.9     |
| ARB                                | 584 (21.6%)       | 456 (22.0%)        | 128 (20.2%)     | 0.3     |
| Calcium channel blocker            | 966 (35.7%)       | 749 (36.1%)        | 217 (34.2%)     | 0.4     |
| Beta blocker                       | 845 (31.2%)       | 663 (32.0%)        | 182 (28.7%)     | 0.1     |
| Diuretic                           | 1208 (44.6%)      | 913 (44.0%)        | 295 (46.5%)     | 0.3     |
| <b>Clinical Results</b>            |                   |                    |                 |         |
| Systolic BP (mm Hg)                | 138.8 (16.0)      | 139.1 (15.8)       | 137.9 (16.6)    | 0.1     |
| Diastolic BP (mm Hg)               | 77.3 (11.8)       | 77.2 (11.9)        | 77.8 (11.5)     | 0.2     |
| BMI (kg/m <sup>2</sup> )           | 29.8 (5.7)        | 29.9 (5.8)         | 29.8 (5.3)      | 0.7     |
| <b>Laboratory Results</b>          |                   |                    |                 |         |
| Urine ACR                          | 9.7 (5.7, 22.5)   | 9.7 (5.9, 22.8)    | 9.7 (5.5, 20.8) | 0.4     |
| eGFR (ml/min/1.73m <sup>2</sup> )  | 71.3 (20.2)       | 70.7 (20.3)        | 72.9 (19.8)     | 0.02    |
| Total Cholesterol (mg/dL)          | 189.9 (41.1)      | 188.9 (41.3)       | 193.2 (40.6)    | 0.02    |
| HDL Cholesterol (mg/dL)            | 53.4 (14.5)       | 53.4 (14.5)        | 53.4 (14.7)     | 0.9     |
| LDL Cholesterol (mg/dL)            | 112.3 (35.4)      | 111.4 (35.4)       | 115.2 (35.2)    | 0.02    |
| Triglycerides (mg/dL)              | 122.4 (71.1)      | 121.5 (69.9)       | 125.1 (74.9)    | 0.3     |

All data are mean (standard deviation), N (%), or median (25<sup>th</sup>, 75<sup>th</sup> percentile). HS, high school; ACE, angiotensin converting enzyme; ARB, angiotensin receptor blocker; BP, blood pressure; BMI, body mass index; ACR, albumin to creatinine ratio; HDL, high density lipoprotein; LDL, low density lipoprotein. To convert ACR to SI units (mg albumin per mmol creatinine), divide ACR by 8.84. To convert cholesterol to mmol/L, multiply by 0.0259 and triglycerides to mmol/L, multiply by 0.0113.
